# Supplementary material
Source: HighWire-hosted journal article supplement (https://cmaj.ca/highwire/filestream/147498/field_highwire_adjunct_files/1/220019-res-2-at.pdf)
Supplement: 220019-res-2-at.pdf [file 220019-res-2-at.pdf]

# Research Opportunity

To learn about experiences of Black (African Nova Scotian) nurses in healthcare

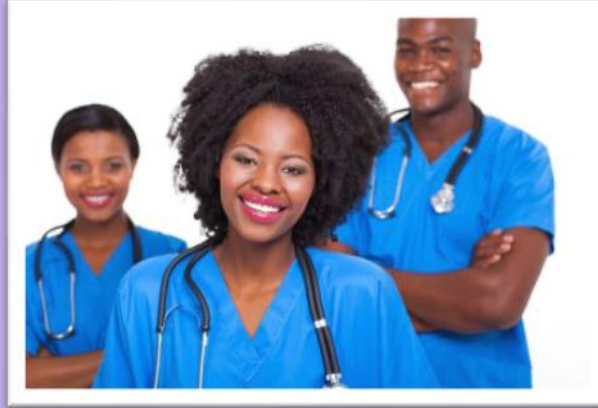

## Study Details

Keisha Jefferies is a registered nurse and PhD student at Dalhousie University. Her research aims to understand and describe the leadership experiences of Black nurses in practice.

The study involves an informal interview with Keisha, where nurses will have the opportunity to share their formal (ie: charge nurse, manager) and informal (mentoring, coaching) leadership experiences in nursing.

If you are interested or know someone who might be, please contact Keisha!

## Eligibility

- \* African/ Black Nova Scotian
- \* Connection to indigenous Black community (at least one Black parent born in Nova Scotia)
- \* Must be a nurse with 1 year of experience
- \* LPN, RN, NP or CNS

\*A token of appreciation will be provided to participants.

Email: [keisha.jefferies@dal.ca](mailto:keisha.jefferies@dal.ca)

For more information  
Keisha.jefferies@dal.ca

For more information  
Keisha.jefferies@dal.ca
